# Supplementary material for: Chemical and physical properties of orthoconic liquid crystals: 2H NMR spectroscopy and molecular dynamics simulations
Source: Royal Society of Chemistry journal article supplement (doi:10.1039/d4sm01321b), 2025-01-01
Supplement: d4sm01321b1.pdf [file d4sm01321b1.pdf]

## SUPPLEMENTARY INFORMATION

### ***Chemical and physical properties of orthoconic liquid crystals: $^2\text{H}$ NMR spectroscopy and Molecular Dynamics simulations***

Anna Drzewicz<sup>a</sup>, Martina Rossi<sup>b</sup>, Mario Cifelli<sup>b</sup>, Giacomo Saielli<sup>c,d</sup>, Marzena Tykarska<sup>e</sup>, Valentina Domenici<sup>b\*</sup>

a. Institute of Nuclear Physics Polish Academy of Sciences, PL-31342 Krakow, Poland.

b. Dipartimento di Chimica e Chimica Industriale, University of Pisa, via Moruzzi 13, Pisa 56124, Italy.

c. CNR, Institute on Membrane Technology Unit of Padova, Via Marzolo, 1 – 35131, Padova, Italy.

d. Department of Chemical Sciences, University of Padova, Via Marzolo, 1 – 35131, Padova, Italy.

e. Institute of Chemistry, Military University of Technology, PL-00908 Warszawa, Poland.

\* Corresponding author: [valentina.domenici@unipi.it](mailto:valentina.domenici@unipi.it)

### **Computational study:**

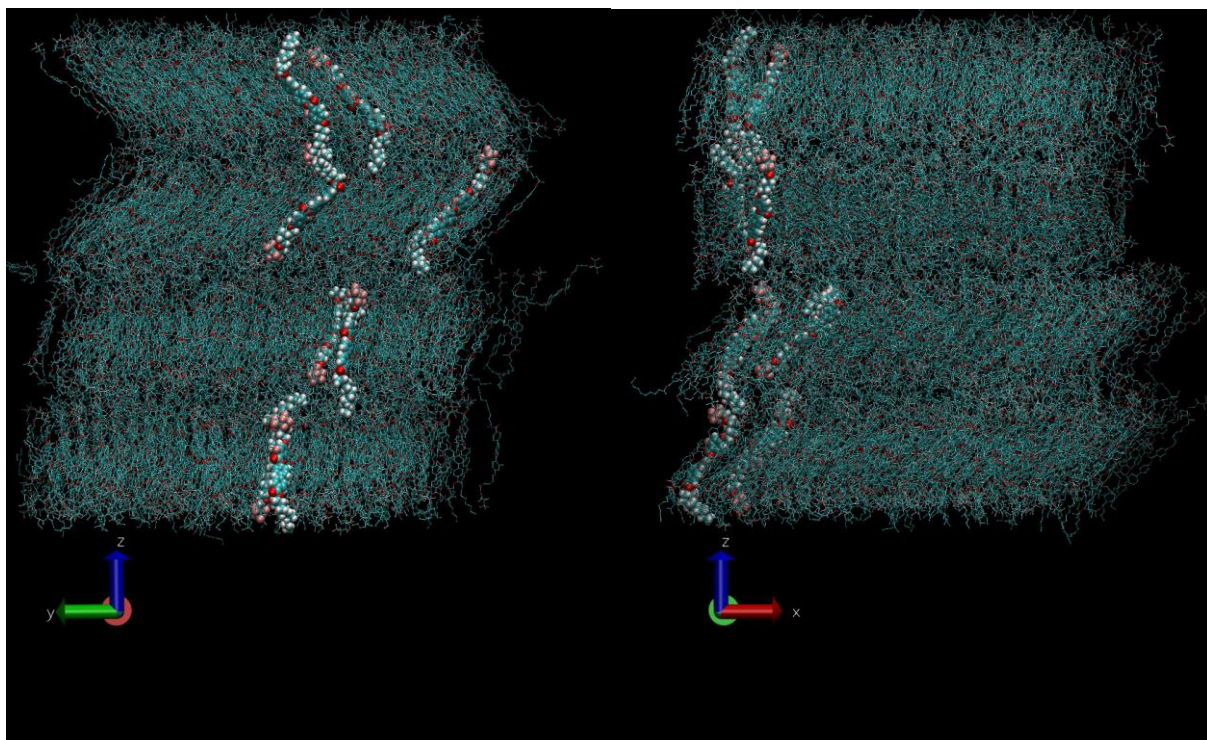

**Figure S1.** Snapshot of the simulation box after 150 ns at  $T = 400$  K, NpT ensemble with semi-isotropic pressure coupling, (left): view along the  $x$  axis; (right): view along the  $y$  axis. Molecules show a large tilt with respect to the layer normal, however there is no correlation of the tilt angles of adjacent layers. From top to bottom, molecules in the first layer are tilted approximately along the  $zy$  diagonal, molecules in the second layer are tilted along the  $z(-y)$  diagonal; molecules in the third and fourth layers are tilted along the  $zx$  diagonal.

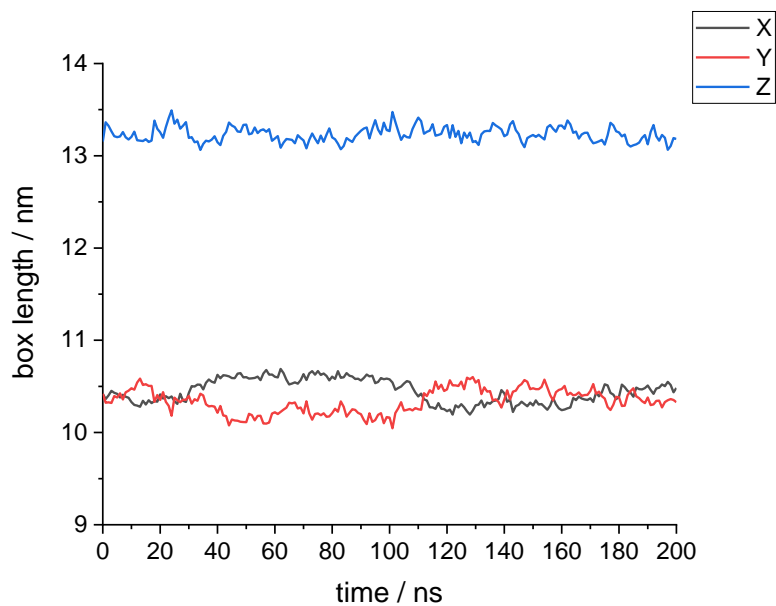

**Figure S2.** Time dependence of the length of the box sides of the simulation box during the equilibration run with fully anisotropic pressure coupling.

**Table S1:** Orientation of selected molecular vectors:  $u_x$ ,  $u_y$ ,  $u_z$  are the unitary components of the given vector in the box frame;  $\theta_z$  is the angle of the given vector with the director of the phase, that is the normal to the layers ( $z$  axis of the box).

|                      | Layer | $u_x$      | $u_y$     | $u_z$     | $\theta_z$ |
|----------------------|-------|------------|-----------|-----------|------------|
| phenyl<br>C01-C04    | 1     | -0.0282405 | -0.678729 | 0.733846  | 42.6545    |
|                      | 2     | -0.168539  | 0.658824  | 0.733175  | 42.7108    |
|                      | 3     | -0.347933  | -0.575065 | 0.740435  | 42.0976    |
|                      | 4     | 0.237812   | 0.628284  | 0.740746  | 42.071     |
| biphenyl<br>C0S-C0E  | 1     | -0.032421  | -0.668928 | 0.74262   | 41.9116    |
|                      | 2     | -0.16388   | 0.651099  | 0.74109   | 42.0419    |
|                      | 3     | -0.343713  | -0.568005 | 0.747818  | 41.4663    |
|                      | 4     | 0.2354     | 0.623312  | 0.745701  | 41.6481    |
| core<br>C0S-C04      | 1     | -0.0326996 | -0.676065 | 0.736116  | 42.4633    |
|                      | 2     | -0.165445  | 0.657079  | 0.735442  | 42.5201    |
|                      | 3     | -0.346887  | -0.573589 | 0.742068  | 41.9586    |
|                      | 4     | 0.237121   | 0.629068  | 0.740302  | 42.1088    |
| head2tail<br>C1O-C2P | 1     | 0.0228838  | 0.506763  | -0.861782 | 149.043    |
|                      | 2     | 0.125012   | -0.484758 | -0.865668 | 149.483    |
|                      | 3     | 0.261362   | 0.436124  | -0.861095 | 148.966    |
|                      | 4     | -0.173703  | -0.468593 | -0.866168 | 149.54     |
| C-chain<br>C1W-C2P   | 1     | 0.0228838  | 0.506763  | -0.861782 | 149.043    |
|                      | 2     | 0.125012   | -0.484758 | -0.865668 | 149.483    |
|                      | 3     | 0.261362   | 0.436124  | -0.861095 | 148.966    |
|                      | 4     | -0.173703  | -0.468593 | -0.866168 | 149.54     |
| F-chain<br>C1O-C04   | 1     | 0.0227049  | 0.50334   | -0.86379  | 149.27     |
|                      | 2     | 0.129351   | -0.477743 | -0.868925 | 149.857    |
|                      | 3     | 0.254393   | 0.432335  | -0.865084 | 149.417    |
|                      | 4     | -0.17493   | -0.45485  | -0.873219 | 150.356    |

## DSC CURVES

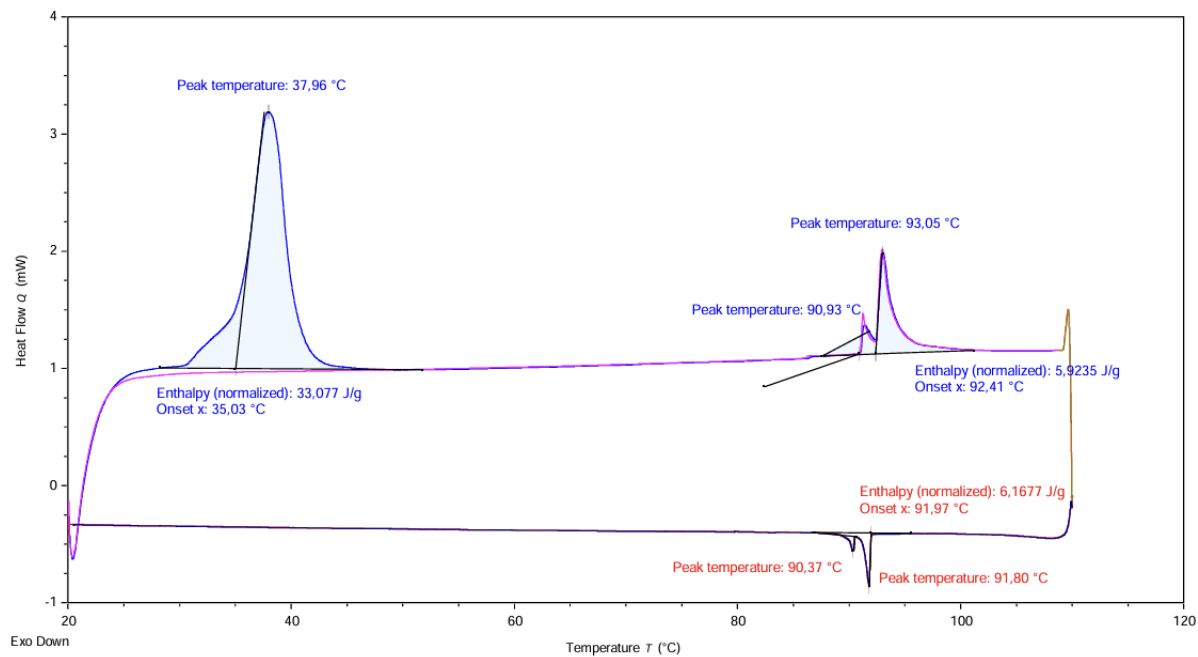

**Figure S3.** DSC of the mixture **3F7HPhF8 + probe-d<sub>4</sub>**. See the main text for explanation.

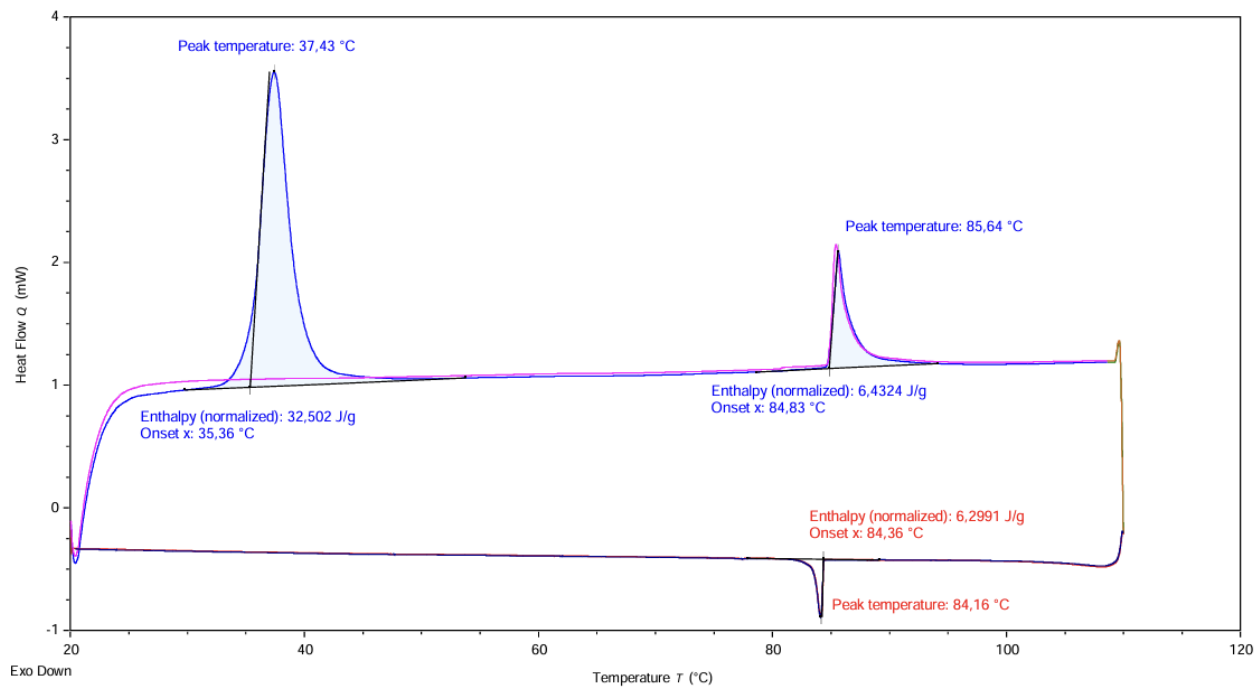

**Figure S4.** DSC of the mixture **3F5HPhF9 + probe-d<sub>4</sub>**. See the main text for explanation.
